# Supplementary material for: New tools to convert bacterial artificial chromosomes to a self-excising design and their application to a herpes simplex virus type 1 infectious clone
Source: PubMed Central journal article supplement (PMC5006514; doi:10.1186/s12896-016-0295-4), 2016-08-31
Supplement: 12896_2016_295_MOESM1_ESM.pdf [file 12896_2016_295_MOESM1_ESM.pdf]

Supplemental Table 1: Primers used in this study

| Final BAC                | Primer                                                                                                                                                                   | BAC Target             | Insert Target             |
|--------------------------|--------------------------------------------------------------------------------------------------------------------------------------------------------------------------|------------------------|---------------------------|
| pHSVf-BFP<br>(pGS5923)   | GS5840: 5'AAGCTGTCAAACATGAGAATTGGTCGACGGCCCGGGCGGC-<br>TAGTTATTAATAGTAATCAATTAGC<br>GS5841: 5'AGCGAGCGAGACGAACGGTCAGAAGCACATCTCGAGGTCG-<br>TAAGATACATTGATGAGTTTG         | pYEbac102<br>(pGS2695) | pEP-BFP-in<br>(pGS4794)   |
| pHSVf-CREin<br>(pGS6000) | GS5952: 5'AGCTGGTTTAGTGAACCGTCAGATCCGCTAGCGGTCGCCACCATG-<br>CCAAGAAGAAGAGGAAGGTGTC<br>GS5953: 5'CTATTGCTTTATTTGTAACCATTATAAGCTGCAATAAACAAGTTA-<br>CTAATCGCCATCTTCCAGCAGG | pHSVf-BFP<br>(pGS5923) | pEP-CREin-in<br>(pGS1518) |
